1 **Title:** Exogenous putrescine alleviates photoinhibition caused by salt stress through  
2 increasing cyclic electron flow in cucumber

3 **Running Title:** Exogenous putrescine and cyclic electron flow

4 Xinyi Wu<sup>1</sup>, Sheng Shu<sup>1,2</sup>, Yu Wang<sup>1</sup>, Ruonan Yuan<sup>1</sup>, Shirong Guo<sup>1,2\*</sup>

5 <sup>1</sup> *College of Horticulture, Nanjing Agricultural University, Nanjing 210095, China;*

6 <sup>2</sup> *Nanjing Agricultural University (Suqian) Academy of Protected Horticulture, Jiangsu*  
7 *223800*

8 Xinyi Wu<sup>1</sup>: [2015204017@njau.edu.cn](mailto:2015204017@njau.edu.cn)

9 Sheng Shu<sup>1,2</sup>: [shusheng@njau.edu.cn](mailto:shusheng@njau.edu.cn)

10 Yu Wang<sup>1</sup>: [ywang@njau.edu.cn](mailto:ywang@njau.edu.cn)

11 Ruonan Yuan<sup>1</sup> : [273729453@qq.com](mailto:273729453@qq.com)

12 Shirong Guo<sup>1,2\*</sup>: [srguo@njau.edu.cn](mailto:srguo@njau.edu.cn)

13 \* **Corresponding author:** Shirong Guo

14 *College of Horticulture, Nanjing Agricultural University, Nanjing 210095, China;*

15 *Tel./fax: +86 25 8439 5267*

16 *E-mail address: [srguo@njau.edu.cn](mailto:srguo@njau.edu.cn)*

17

18

19

20

21

22

23

24

25 **Title:** Exogenous putrescine alleviates photoinhibition caused by salt stress through  
26 increasing cyclic electron flow in cucumber

27 **Running Title:** Exogenous putrescine and cyclic electron flow

28 **Highlight:** This research describes a novel mechanism of exogenous putrescine regulate cyclic  
29 electron flow through ATP generation and  $\Delta$ pH reduction to protect photosynthetic apparatus in  
30 salt-stressed cucumber seedlings.

31 **Abstract**

32 When plants suffer from abiotic stresses, cyclic electron flow (CEF) is induced for  
33 photoprotection. Putrescine (Put), a main polyamine in chloroplasts, plays a critical role in  
34 stress tolerance. To elucidate the mechanism of Put regulating CEF for salt-tolerance in  
35 cucumber leaves, we measured chlorophyll fluorescence, P700 redox state, ATP and NADPH  
36 accumulation and so on. The maximum photochemical efficiency of PSII (Fv/Fm) was not  
37 influenced by NaCl and/or Put, but the activity of PSI reaction center (P700) was seriously  
38 inhibited by NaCl. Salt stress induced high level of CEF, moreover, NaCl and Put treated  
39 plants exhibited much higher CEF activity and ATP accumulation than single salt-treated  
40 plants to provide adequate ATP/NADPH ratio for plants growth. Furthermore, Put decreased  
41 the trans-membrane proton gradient ( $\Delta$ pH), accompanied by reducing the pH-dependent  
42 non-photochemical quenching (qE) and increasing efficient quantum yield of PSII (Y(II)).  
43 The ratio of NADP<sup>+</sup>/NADPH in salt stressed leaves was significantly increased by Put,  
44 indicating that Put relieved over-reduction pressure at PSI acceptor side. Taken together, our  
45 results suggest that exogenous Put enhances CEF to supply extra ATP for PSI recovery and  
46 CO<sub>2</sub> assimilation, decreases  $\Delta$ pH for electron transport related proteins staying active, and  
47 enable the non-photochemical quenching transformed into photochemical quenching.

48 **Key words:** Cyclic electron flow, cucumber, photoinhibition, photoprotection, putrescine, salt  
49 stress.

50 **Abbreviations:**

51 Put, putrescine; CEF, cyclic electron flow;  $Fv/Fm$ , maximum quantum yield of photosystem II;  
52 NPQ, non-photochemical quenching; PGR5, protein gradient regulation; PGRL1, PGR-like 1 ;  
53 NDH, NAD(P)H dehydrogenase; LEF, linear electron flow;

## 54 **Introduction**

55 In recent years, secondary salinization has become a major environmental factor that limits  
56 yield and quality of vegetable crops in protected cultivation of China. Salt stress can induce  
57 ionic toxicity and osmotic stress, which result in the damage to biological macromolecules  
58 and interfere with metabolisms in plant cells (Munns and Tester, 2008; Yan et al., 2015).  
59 Photosynthesis fuels plant growth, but it is sensitive to salt stress, by virtue of this correlation,  
60 photosynthetic capacity is thought to be an important criterion for diagnosing plant  
61 adaptability to salinity (Kalaji et al., 2011).

62 In the process of plants evolution, the photosynthetic thylakoid membrane system has  
63 evolved several regulation mechanisms enabling them to adapt to stress condition  
64 (Takabayashi et al., 2009). Cyclic electron flow (CEF) in PSI, an important photoprotection  
65 pathway, can regulate electron transport mode to acclimatize itself to adverse environment  
66 (Shikanai et al., 1998; Horváth et al., 2000; Munekage et al., 2004). The cyclic process could  
67 be visualized as following description: electrons transferred to the PSI reaction center are  
68 contributed to primary electron receptor. Then, they are passed to ferredoxin (Fd), an iron  
69 containing protein which acts as an electron carrier. The reduced Fd are able to transport  
70 electrons to the second electron carrier plastoquinone (PQ) through two available pathways i.e.  
71 the protein gradient regulation 5 (PGR5)/PGR-like 1 (PGRL1)-dependent pathway and the  
72 NAD(P)H dehydrogenase (NDH) complex-dependent pathway (Burrows et al., 1998;  
73 Munekage et al., 2002; Shikanai, 2007; DalCorso et al., 2008). After that, PQ carries electrons  
74 to cytochromes *b6f* (Cyt *b6f*). In the process, proton gradient across thylakoid membrane  
75 ( $\Delta\text{pH}$ ) comes into development, the main functions of  $\Delta\text{pH}$  are: (1) together with  $\Delta\psi$   
76 (trans-membrane electric potential) used for ATP synthesis by the ATP synthase; (2)  
77 stimulates photoprotection pathway called “non-photochemical quenching”, which competes  
78 with photochemical quenching under excessive light conditions and consume the excited  
79 energy, avoiding the production of triplet chlorophylls that react with molecular oxygen  
80 (Munekage et al., 2002). Ultimately, electrons are returned to P700 by plastocyanin (PC) to

81 finish the cycle.

82 Recent research has demonstrated that CEF plays an extremely important and essential role  
83 in plants photosynthesis and development (Sun et al., 2017). When linear electron flow (LEF)  
84 is affected by fluctuant environment, CEF is an essential alternative pathway to replenish  
85 ATP and keeps a high  $\Delta pH$  which is required for energy-dependent quenching (qE, the fast  
86 phase of NPQ) to dissipate surplus excited energy (Niyogi, 1999; Muller et al., 2001).  
87 Therefore, switching between LEF and CEF is an adaptation mechanism for unsteady  
88 environment to keep an appropriate ATP/NADPH ratio required for plants growth. Previous  
89 work suggested that LEF plays a dominant role and the effect of CEF is negligible on normal  
90 condition (Shikanai, 2007). However, when plants suffer from abiotic stress, LEF is  
91 significantly inhibited, and the excess electron preferably injectes to CEF, respiratory chain  
92 and combines with O<sub>2</sub> to produce ROS. Taken together, CEF is indispensable for plants to  
93 resist photodamage under stress condition.

94 Putrescine (Put) is a ubiquitous diamine [NH<sub>2</sub>(CH<sub>2</sub>)<sub>4</sub>NH<sub>2</sub>], which is the obligate precursor  
95 of spermidine (Spd) and spermine (Spm). They are low-molecular weight aliphatic amines  
96 and constitute the major polyamines in plants (Ioannidis and Kotzabasis, 2007), which are  
97 essential for plant growth and development and stress response (Capell et al., 2004; Hussain  
98 et al., 2011). Polyamines are firstly recognized as their cationic character, which is one of the  
99 main properties believed to mediate their biological activity, therefore they can interact with  
100 negatively charged macromolecules such as DNA, RNA, proteins and phospholipids, leading  
101 to the stabilization of macromolecules (Kaur-Sawhney et al., 1978; Schuber, 1989; Galstoon  
102 and Sawhney, 1990). Some genes involved in PAs biosynthesis are found in the chloroplast,  
103 showing their possible relation with photosynthetic process. In chloroplast, PAs conjugating  
104 to negatively charged macromolecules is catalyzed by an enzyme named transglutaminase  
105 (TGase). This enzyme catalyses the incorporation of PAs into thylakoid and stromal proteins  
106 such as the light harvesting complex (LHC) and the large subunit of Rubisco (Hamdani et al.,  
107 2011). Besides their polycationic nature, PAs was found playing an other important  
108 bioenergetic role as a permeant natural buffer, because they can be found in a charged or  
109 uncharged form, although uncharged forms represent less than 0.1%, the physiological role  
110 could be crucial in chemiosmosis (Ioannidis and Kotzabasis, 2014). Our previous work has

111 demonstrated that exogenous Put can alleviate the damaging effects of salt stress on the  
112 structure and function of the photosynthetic apparatus in salt-stressed cucumber seedling  
113 leaves (Shu et al., 2012; Yuan et al., 2014; Yuan et al., 2017). However, the regulation and  
114 mechanism of CEF induced by Put has not been reported yet. In the present study, we found  
115 Put was more prominent in chemiosmosis regulation, it directly facilitate the production of  
116 ATP, which is crucial for P700 repair, the larger content of active P700 induces the higher  
117 CEF level; On the other hand, exogenous put is a neutralizer to alleviate reduction of pH  
118 caused by CEF. Additinally appropriate pH in lumen is required for the electron transport  
119 related protein to stay active and enable the non-photochemical quenching transformed into  
120 photochemical quenching. To sum up, this results reveal an important mechanism for  
121 putrescine inducing CEF to alleviate photoinhibition caused by salt stress in cucumber plants,  
122 and provides new insights into the role of put in photoprotection to salt stress.

## 123 **Materials and methods**

### 124 *Plant material and growth conditions*

125 Cucumber (*Cucumis sativus* L. Cv. Jinyou NO. 4, obtained from Tian Jin Kernel Cucumber  
126 Research Institute, Tianjin, China). seeds were germinated on moist gauze in the dark for 16 h  
127 at 28 °C and were placed in 3cm\*3cm\*4cm sponges. When the first leaves were fully  
128 expanded, the seedlings were transplanted into smart climatic chambers (AETrium 3,  
129 AEssense Corp., Shanghai, America) at an irradiance of 400  $\mu\text{mol m}^{-2} \text{s}^{-1}$  for 12 h everyday,  
130 day/night temperature were set as 28/18°C with  $\sim 65 \pm 5$  % relative humidity. The seedlings  
131 were grown hydroponically with half-strength Yamazaki soilless culture nutrient solution for  
132 cucumber (pH  $6.2 \pm 0.1$ , EC 1.0-1.2). When the third leaves were fully expanded, the  
133 seedlings were treated as follows: (1) Cont, control, plants were grown in normal condition;  
134 (2) Put, normal growth plants were sprayed with 8 mM Put on leaves; (3) NaCl, plants were  
135 treated with 90 mM NaCl in nutrient solution; (4) NaCl + Put, salt stressed plants were  
136 sprayed with 8 mM NaCl on leaves. Put was sprayed 60 min before the light turned on every  
137 day. The third fully expanded leaves (from the top) were sampled after treatment for 7 days  
138 and immediately frozen in liquid nitrogen.

### 139 *Gas-exchange measurements*

140 Gas-exchange parameters were measured using a portable photosynthesis system (LI-6400,  
141 LI-COR Inc, USA) as described by Shu et al (Shu et al., 2013). The photosynthetic rate was  
142 measured at  $400 \pm 10 \mu\text{mol}\cdot\text{mol}^{-1} \text{CO}_2$ ,  $25^\circ\text{C}$ , 70% relative humidity, and  $1500 \mu\text{mol}\cdot\text{m}^{-2}\cdot\text{s}^{-1}$   
143 light intensity.

#### 144 *Measurement of chlorophyll fluorescence*

145 Chlorophyll (Chl) fluorescence was performed using IMAGING-PAM Chl fluorescence  
146 analyser (Heinz Walz, Effeltrich, Germany), plants were fully adapted in dark before  
147 measurement. The chlorophyll fluorescence parameters were calculated as follows (Daisuke et  
148 al., 2016): maximum photochemical efficiency of PSII,  $F_v/F_m = (F_m - F_o)/F_m$ ; effective  
149 photochemical quantum yield of PSII,  $Y(\text{II}) = (F_m' - F_s)/F_m'$ ; non-photochemical quenching,  
150  $\text{NPQ} = (F_m - F_m')/F_m'$ ; redox state of  $Q_A$ ,  $1 - q_P = 1 - (F_m' - F)/(F_m' - F_o')$ ; regulatory energy  
151 dissipation quantum yield of PSII,  $Y(\text{NPQ}) = 1 - Y(\text{II}) - 1/(\text{NPQ} + 1 + q_L(F_m/F_o - 1))$ ;  
152 non-regulatory energy dissipation quantum yield of PSII,  $Y(\text{NO}) = 1/(\text{NPQ} + 1 + q_L(F_m/F_o - 1))$ .  
153 For photoresponse curve measurement, every intensity light was last 30 seconds. NPQ  
154 relaxation was analyzed by following protocol: fully dark adapted plants were illuminated  
155 with  $396 \mu\text{mol m}^{-2} \text{s}^{-1}$  light for 240 s, followed with 506 s dark, saturated pulse was applied  
156 every 20 seconds.

157 The post-illumination transient increase in Chl fluorescence was determined as previously  
158 described (Shikanai et al., 1998). Plants were dark adapted at least 1h, and the optimal room  
159 temperature was  $25^\circ\text{C}$ , illumination light intensity was set as  $396 \mu\text{mol m}^{-2} \text{s}^{-1}$ .

#### 160 *Measurement of P700 redox changes and delayed fluorescence*

161 P700 redox changes was reflected of 820 nm transmission measured by M-PEA (Hansatech,  
162 Norfolk, UK) on channel 2. The protocol was modified according to the procedure described  
163 by Yan et al (2015). Plants were dark adapted for 30 min, then illuminated with 1s saturated  
164 red light ( $5000 \mu\text{mol m}^{-2} \text{s}^{-1}$ ), followed with 10s far-red light (intensity = 100%), and the 1 s  
165 red light + 10 s far-red light was repeated for 5 times. The P700 oxidation and P700<sup>+</sup>  
166 re-reduction were measured by following procedure: fully dark adapted leaves was firstly  
167 induced by far-red light (intensity = 25%, 100s), followed with 30 s dark. Initial rate (0~2s of

168 P700 oxidation; 0~0.3 s of P700<sup>+</sup> re-reduction) and  $t_{1/2}$  were calculated (Wang et al., 2006).

169 To calculate  $\Delta I/I_0$ , the first 10 s far-red consequence combined with following formulae  
170 were used:  $I_0$ , the average of the 820-nm transmission signal between 0.4 and 10 ms;  $I_m$ , the  
171 average of the 820-nm transmission signal between 3 and 10 s;  $\Delta I/I_0 = (I_0 - I_m)/I_0$  (Zhang et  
172 al., 2011).

173 Delayed fluorescence was measured by M-PEA (Hansatech, Norfolk, UK) on channel 1.  
174 Different light intensities are able to present diverse delayed-fluorescence curves, in order to  
175 get  $I_4$ , the light intensity was set as  $600 \mu\text{mol m}^{-2}\text{s}^{-1}$  continued for 200s,  $(I_1 - D_2)/D_2$  and  
176  $(I_4 - D_2)/D_2$  were calculated as described by Mehta et al. (2011).

#### 177 *Quantitative real-time PCR*

178 Leaves were light adapted for 20 min before snap frozen in liquid nitrogen, so that the  
179 light-induced state can be preserved. RNA was extracted from three biological replicates of  
180 cucumber leaves using RNA extraction kit (TIANGEN). cDNA was synthesized from 1  $\mu\text{g}$  of  
181 DNase-treated RNA with the TaKaRa First Strand cDNA Synthesis Kit using oligo (dT)  
182 primers. Quantitative real-time PCR was performed using gene specific primers (Table S1) in  
183 20  $\mu\text{l}$  reaction system using SYBR Premix Ex Taq II (TaKaRa).

#### 184 *Determination of light induced ATP, NADPH, NADP<sup>+</sup> content and activity of RCA*

185 To determine light induced ATP, NADPH and NADP content in leaves, the third leaves  
186 which dark adapted at least for 1h and light induced 20 min were collected separately. ATP  
187 content was measured as described by He et al. (2015). 0.1 g samples were grinded in ice with  
188 0.9 ml acidity/alkalinity extraction buffer used for NADP<sup>+</sup>/NADPH quantification, the tubes  
189 with samples were kept for 5 min at 100 °C in a boiling water. Then, the samples were kept in  
190 ice for cooling and centrifugated at 10,000g for 10 min at 4 °C. Supernatant was collected in  
191 new tubes and neutralized with the same volume of alkalinity/acidity buffer, centrifugated at  
192 10,000g for 10 min at 4°C, the supernatant was used for analysis. 0.2 g samples were used for  
193 tissue homogenate preparation and the RCA activity was measured by ELISA kit.

#### 194 *Statistical analysis*

195 All biochemical analyses were conducted at least three times. All data were statistically  
196 analyzed with SPSS software using Tukey's test at the  $P < 0.05$  level of significance.

197 **Results**

198 *Exogenous Put alleviates the inhibition of NaCl on cucumber growth*

199 As shown in Fig. 1A, there was no significant difference between control and Put treated  
200 plants under normal conditions. After 7 days of treatment, the growth of NaCl-only treated  
201 plants was dramatically inhibited compared with other treatment plants (Fig. 1A). The fresh  
202 weight, dry weight and leaf area of NaCl treated plants decreased by 52.24%, 52.78% and  
203 39.96% respectively compared with that in control plants (Fig. S1). In contrast, exogenous  
204 Put significantly promoted plant growth in comparison to NaCl-only treated plants (Fig.  
205 S1A-C). This trend can also be seen from the data of gas-exchange parameter in Fig. 1B-E  
206 that NaCl stress dramatically decreased net photosynthesis rate (Pn), stomata conductance  
207 (Gs), intercellular carbon dioxide concentration (Ci) and transpiration rate (Tr) in cucumber  
208 leaves, these parameters were recovered by exogenous Put that close to non-stressed leaves.  
209 Nevertheless, The results of chlorophyll content showed no obvious different between all  
210 treatments (Fig. S1D).

211 *Effects of salt stress and exogenous Put on photosynthetic properties of PSII*

212 To investigate how the PSII performed in salinity and how it affected by Put in growth light of  
213 cucumber seedlings,  $F_v/F_m$ , Y(II), Y(NPQ) and Y(NO) ( $Y(II)+Y(NPQ)+Y(NO)=1$ ) was  
214 detected under  $396 \mu\text{mol m}^{-2} \text{s}^{-1}$  light intensity. As shown in Fig. 2A,  $F_v/F_m$  was similar in all  
215 of the treatment plants after 7 days of salt stress, indicating that PSII did not suffer a serious  
216 damage under 90 mM NaCl stress condition. Significantly, the effective quantum yield of  
217 PSII (Y(II)) in salt stressed cucumber leaves was decreased by 30% compared with  
218 non-stressed cucumber leaves, with the addition of exogenous Put, the Y(II) increased to 1.34  
219 times as high as control. Y(NPQ) is regulatory thermal dissipation quantum yield, which  
220 reflects self-protection ability of PSII, Y(NPQ) of NaCl treated cucumbers was 20% higher  
221 than Control plants, however it was a little bit lower after spraying exogenous Put under salt  
222 stress compared with control. In contrast to Y(NPQ), Y(NO), the non-regulatory thermal  
223 dissipation, represents impaired level of PSII, showed no difference in all of the treatment  
224 plants, indicating that 90 mM NaCl was not destructively harmful to PSII.

225 Character of chlorophyll fluorescence are known be responsive to light intensity, so light  
226 response curves were measured. Photosynthetic electron flow (electron transport rate, ETR)



227 of NaCl stressed plants was dramatically lower than that in the control plants, but the ETR in  
228 NaCl together with Put treated seedlings was even higher than that in the control plants (Fig.  
229 2B). The fast light response curve of Y(II) had a similar trend with ETR curve, it is apparent  
230 from this graph that exogenous Put was more obviously beneficial for salt stressed leaves in  
231 low light intensity (Fig. 2C). Redox state of  $Q_A$  (1-qP), the primary electron acceptor of PSII,  
232 displayed an obvious increase in salt-treated plants, and it was a little bit lower in NaCl + Put  
233 than Cont and Put under moderate light condition (Fig. 2D). NPQ (non-photochemical  
234 quenching) is an important photoprotective mechanism to dissipate excess energy, which  
235 reflects the self-protected ability, and it could also indirectly represent the utilization ability of  
236 light energy. Induction of NPQ in increasing light intensity condition was much stronger in  
237 salt-stressed leaves than the control plants, however, in NaCl + Put treatment plants the  
238 induction of NPQ was gentle under low light condition, but with the increase of light intensity  
239 the induction rate accelerated, and it exceeded Cont and Put treatment plants when light  
240 intensity was higher than 400 and 700  $\mu\text{mol m}^{-2} \text{s}^{-1}$  respectively (Fig. 2E). These results  
241 indicated that 90 mM NaCl stress influenced the photosynthetic properties even in low light  
242 condition, and exogenous Put could alleviate the changes caused by salt stress only under low  
243 light illumination.

244 NPQ induction during light to dark transition was also monitored (Fig. 2F). In all treatments,  
245 NPQ was transiently induced within 1 min light ( $396 \mu\text{mol m}^{-2} \text{s}^{-1}$ ) and relaxed within 4 min  
246 dark. NaCl stressed cucumbers exhibited a distinct increase in the rapid induction and  
247 relaxation of NPQ, which reached 2.46 after 1 min illumination, and relaxed efficiently, NaCl  
248 + Put treatment had a similar dynamic curve with Cont and Put. Photosynthetic systems will  
249 drive non-photochemical quenching when they are subjected to salt stress in light, but  
250 exogenous Put will decrease the dissipation which is agreement with findings of other groups  
251 (Lütz et al., 2005; Ioannidis et al., 2006), that reveals another photoprotection mechanism  
252 driven by Put.

### 253 *Effects of salt stress and exogenous Put on P700 activity*

254 P700<sup>+</sup> can absorb 820 nm light when it is oxidated, thus the redox state of P700 was indicated  
255 by 820 nm-reflection (Munekage et al., 2004). However, besides P700<sup>+</sup>, other plant tissue can  
256 also absorb 820 nm light, and changes of leaves tissue structure will impact measurement of

257 reflection at 820 nm. In order to exclude other influential factors,  $MR/MR_0$  was used to  
258 express reflection kinetic curve at 820 nm light ( $MR_0$ , the first reliable MR at the beginning of  
259 illumination) (Strasser et al., 2010).

260 Figure 3A is a complete curve of 5 times repeat experiment, in which leaves were  
261 illuminated on 1 s red light followed with 10 s far-red light. This curve presented a significant  
262 decrease in the content of P700 that had potential to be oxidated (the lower  $MR/MR_0$  signal  
263 means the higher P700 activity) in salt-stressed leaves, to a degree, spraying Put was able to  
264 protect P700 from salt stress. Moreover, content of oxidative P700 of salt stressed leaves  
265 reached to a steady state at the first time illumination of far-red light, but other oxidative  
266 curves were all sloped down, which demonstrated that every time after illumination with  
267 far-red light, the content of oxidative P700 increased progressively, suggesting that they all  
268 stored a number of P700 for urgent condition except treatment NaCl.

269 Relative activity of P700 was also quantified by  $\Delta I/I_0$  (P700 relative activity of Cont was  
270 assumed to 100%). As shown in Fig. 3B,  $\Delta I/I_0$  in salt stressed leaves dropped off by 38.18%  
271 than control plants, indicating PSI was seriously inhibited under salt stress. However,  $\Delta I/I_0$  in  
272 salt stressed with exogenous Put application only decreased by 17.81% in comparison to  
273 control plants. Then, methyl viologen (MV), an electron acceptor of P700 down-stream and  
274 also an inhibitor of CEF, was used in the experiment, as shown in Fig. S4 when the P700  
275 could be oxidized sufficiently by MV, the content of active P700 in salt stressed cucumber  
276 leaves returned to normal (the same as control). Interestingly, exogenous Put obviously  
277 increased the P700 activity in non-stressed cucumber.

#### 278 *Induction of CEF by salt stress and exogenous Put*

279 If indeed P700 is affected by salt stress and exogenous Put application, one would expected to  
280 see an effect on the CEF level, therefore CEF was detected by different methods.

281 Post-illumination is a signal of the transient increase of dark-level chlorophyll fluorescenc  
282 after actinic light illumination, which is an important indicator of CEF around PSI (Shikanai  
283 et al., 1998). After seedlings were dark-adapted adequately post-illumination was measured on  
284  $396 \mu\text{mol m}^{-2} \text{s}^{-1}$  light intensity. The curves of Fig.4 is fluorescence re-increase condition, it  
285 revealed a feeble increase in control cucumber leaves, while exogenous Put could slightly  
286 enhance the increase of fluorescence. Significantly, the intensity of fluorescence re-increase

287 signal was dramatically enhanced after NaCl treatment. Interestingly, a much higher CEF  
288 level appeared in treatment NaCl + Put plants.

289 When dark adapted leaves exposed to light, the oxidation rate of their P700 could reflect  
290 CEF level, the slower of P700 oxidation rate means the faster of CEF induction rate. So the  
291 leaves were illuminated with saturate far-red light for 10 s, meanwhile reflection signal was  
292 recorded. Re-reduction of oxidative P700<sup>+</sup> is another indicator of CEF, a faster re-reduction  
293 rate means a faster CEF induction rate. Hence, kinetic curve of P700 oxidation and P700<sup>+</sup>  
294 re-reduction was measured and the half time when the curve got steady was calculated. The  
295 re-reduction rate in NaCl and NaCl + Put treatment plants was higher than that in Cont and  
296 Put treatment plants (Fig.5A), the  $t_{1/2}$  of P700<sup>+</sup> re-reduction was 0.21, 0.20, 0.16, 0.11s in  
297 Cont, Put, NaCl, NaCl + Put respectively (Fig.5B). In addition, the oxidation rate of P700 had  
298 a stepwise increase from Cont to NaCl + Put (Fig. 4C). The  $t_{1/2}$  of P700 oxidation was 2.18,  
299 2.20, 2.34, 2.61s in Cont, Put, NaCl, NaCl + Put respectively (Fig. 4D). These results  
300 suggested that salt stress induced CEF to protect the photosynthetic apparatus, and exogenous  
301 Put acted as an accelerator to enhance CEF induction.

302 *NaCl stress and Put treatment changes pmf formation across thylakoid membrane in*  
303 *cucumber leaves*

304 Due to changes of electron transport chain could influence H<sup>+</sup> accumulation in lumen, we  
305 measured *trans*-thylakoid proton gradient ( $\Delta\text{pH}$ ) by delayed fluorescence (Fig. 6A). Increase  
306 from D<sub>2</sub> to I<sub>4</sub> accompanied by excitaiton of PSI after illumination, the amplitude is connected  
307 with formation of  $\Delta\text{pH}$  (Evans and Crofts, 1973). It should be noted that the detector can  
308 obtain various induction curve when under different light intensity condition. 3000  $\mu\text{mol m}^{-2}$   
309  $\text{s}^{-1}$  light induced an inconspicuous I<sub>4</sub>, however, the I<sub>4</sub> induced by 600  $\mu\text{mol m}^{-2} \text{s}^{-1}$  light was  
310 apparent.  $(I_4 - D_2)/D_2$  is a representation for  $\Delta\text{pH}$ , salt stressed cucumber leaves induced high  
311 level of CEF with high  $\Delta\text{pH}$ . Although CEF intensity of NaCl + Put-treated plants was higher  
312 than that in NaCl only treated plants, the  $\Delta\text{pH}$  was decreased with Put application under salt  
313 stress (Fig. 6C). With our results, the changes in one more characteristic point, I<sub>1</sub>, was  
314 observed. This first maximum is related to the accumulation of *trans*-membrane electrical  
315 potential ( $\Delta\psi$ ) by oxidation of PSI (Pospíšil and Dau, 2002). The maximum I<sub>1</sub> in salt stressed  
316 leaves was lower than other treatments (Fig. 6A), indicating a lower gradient of  $\Delta\psi$  in salt

317 stressed leaves.

318 *Effects of salt stress and exogenous Put on light induced ATP, ATP/NADPH, NADP<sup>+</sup>/NADPH*  
319 *and RCA activity in cucumber leaves under different treatments*

320  $\Delta pH$  together with  $\Delta \psi$  comprises proton motive force (*pmf*) which fuels ATP generation, ATP  
321 and NADPH are production of photosynthetic electron transport, act as assimilatory power for  
322 CO<sub>2</sub> fixation. Therefore, content of ATP, NADPH and NADP<sup>+</sup> is another indirect important  
323 indicator for electron transport activity. They are all measured in light- and dark-adapted  
324 leaves, light induced production was calculated as content in light minus in dark. Fig. 7A  
325 revealed a significant decrease of ATP production induced by light in salt-stressed leaves,  
326 expectedly, exogenous Put promoted the ATP generation 40.36% more than that of treatment  
327 NaCl. In non-stress conditions, the ATP/NADPH ratio was maintained to 0.33 for plants  
328 normal growth, however, this ratio decreased to 0.09 after 7 days of salt stress (Fig. 7B). The  
329 reason why the ATP/NADPH ratio decreased such violently not just because of decline of ATP  
330 production, but also due to the depressed RCA (rubisco activase) activity (Fig. 7D) making  
331 the NADPH unable to be consumed efficiently in carbon assimilation phase, consequently  
332 resulting in accumulation of NADPH, further leading to an extremely low NADP<sup>+</sup>/NADPH  
333 ratio (Fig. 7C), these all manifest that the thylakoid membrane was over-reduced in  
334 salt-stressed cucumber plants.

335 *Changes of gene expression analysis of electron transport related proteins*

336 It has been demonstrated that, ferredoxin 2 in Arabidopsis is a dominated protein of electron  
337 transport chain, which participates in LEF, and Ferredoxin 1 is an accessory protein attributed  
338 to CEF (Holtgreffe et al., 2003; Blanco et al., 2011; Liu et al., 2013). We compared the amino  
339 acid sequence in cucumber with that in Arabidopsis. The sequence of Fd L-A like protein in  
340 *Cucumis sativus* has a high homology with Fd1 in arabidopsis, the similarity reaches to 64%,  
341 and the amino acid sequence of Fd in *Cucumis sativus* is 63% similar to that of Fd2 in  
342 arabidopsis (Fig. S3). As expected, in salt stress condition the transcript level of Fd in  
343 cucumber leaves was significantly down-regulated (30.27% lower than Cont), and the level of  
344 Fd L-A like was up-regulated (136.68% higher than Cont), however, exogenous Put increased  
345 the transcript level of Fd in salt-stressed by 2.47 times compared with treatment NaCl, but not  
346 affected transcription of Fd L-A like (Fig. 8B).

347 Fd-NADPH oxidoreductase (FNR) is an electron receptor of PSI in electron transport chain.  
348 Some report suggested that FNR was involved in NDH-dependent CEF, some said FNR had  
349 no connection with CEF (Zhang et al., 2001; Medina and Gómez-Moreno, 2004). Our gene  
350 expression results showed a down-regulation of FNR in response to salt stress in cucumber  
351 leaves, but the up-regulation was pronounced after spraying with Put in salt-stressed  
352 cucumber leaves (Fig. 8A).

353 The gene expression level of the dominating proteins regulationg the two known CEF  
354 pathways were also determined. NDH4 is a main subunit of NDH complex in cucumber  
355 chloroplast, unexpectedly its transcript level was down-regulated in salt stressed leaves, and  
356 which performed similar to treatment NaCl + Put. In contrast to NDH4, transcript levels of  
357 PGR5 and PGRL1 were distinctly up-regulated in response to salt stress (100.42% and 78.24%  
358 for PGR5 and PGRL1 respectively higher than Cont), even more, exogenous Put induced  
359 higher transcription level of PGR5/PGRL1 than NaCl treatment. This results proved that the  
360 PGR5/PGRL1-dependent pathway is the major CEF in response to salt stress (Fig. 8A).  
361 Accordingly, transcript levels of ATP synthase  $\Delta$  and  $\gamma$  subunit were all down-regulated after 7  
362 days of salt stress, and it was unchanged even up-regulated in treatment NaCl + Put compared  
363 with Cont (Fig. 8B).

## 364 **Discussion**

365 *NaCl stress induced a serious photoinhibition rather than a photodamge in PSI and PSII of*  
366 *cucumber leaves*

367 Effects of salinity on two photosystems were controversial all the time, due to different plant  
368 species and various treatment protocol. Some studies proved that PSII was sensitive to salinity  
369 (Demetriou et al., 2007; Mehta et al., 2010), whereas other studies demonstrated a high  
370 salt-resistance of PSII (Lu et al., 2003; Yan et al., 2015). In this study, 90 mM NaCl was no  
371 effect on  $F_v/F_m$  (Fig. 2A), which was in accordance with previously study (Chen et al., 2013),  
372 and the Y(II) of salt stressed cucumber leaves relaxed efficiently after light turned off,  
373 although it was significantly lower than other treatments in the light-induce phase (Fig. S2).  
374 Furthermore, the Y(NO) didn't change after salt stress. These results suggested that 90mM  
375 NaCl stress would not cause an irreversible damage on PSII, which was consistent with the

376 changeless of chlorophyll content (Fig. S1D), and the excess excited energy that can not be  
377 utilized was consumed by non-photochemical quenching (Fig. 2A, E, F) to protect PSII from  
378 photodamage.

379 In contrast to PSII, few studies focused on how salt stress influences PSI capacity in plants.  
380 The electron flow from PSII is essential for PSI photoinhibition, if electrons are blocked  
381 before PSI, PSI photoinhibition can be suppressed and it is helpful for PSI recovery (Zhang et  
382 al., 2011). Unfortunately, PSII was not efficiently inhibited in our study, excess electrons  
383 rushed into PSI, resulting to over-reducing in the accept side of PSI (Fig. 7C) and the active of  
384 P700 was seriously impaired (Fig. 3). Nevertheless, the salt-influence of P700 was not  
385 irreversible, when MV accepted electrons from P700, the oxidizable P700 activity was  
386 recovered (Fig. S4).

387 Taken together, these results indicated that 90 mM NaCl was not acutely harmful to PSII  
388 and PSI, it would inhibit the activity of the two photosystems, but not damage them.

#### 389 *Exogenous Put induces a stronger CEF under salt stress*

390 The results showed that NaCl stress compelled the leaves to drive a high level of CEF (Fig. 4,  
391 5), which was effective to protect PSII, but not enough for PSI. Increasing CEF induction by  
392 exogenous Put was apparent in our results. PAs were seen by researchers as cations and  
393 chemical equilibrium buffers (Ioannidis et al., 2006). Cationic effects can induce stacking of  
394 thylakoids that similarly to divalent inorganic cations. Buffering role of PAs can stimulate  
395 ATP synthesis (Ioannidis and Kotzabasis, 2007). Put drastically stimulated phosphorylation in  
396 light, the ATP generated in NaCl + Put treatment was 40.40% more than that in NaCl single  
397 treated leaves. In addition, PAs also participate in the modulation of *pmf* in thylakoid *in vivo*  
398 by dissipating  $\Delta pH$  and favoring  $\Delta\psi$  (Ioannidis et al., 2012; Ioannidis and Kotzabasis, 2014).  
399 A lower  $\Delta pH$  in Put treated plants was shown in Fig. 6C. Abundant ATP is essential for PSI  
400 recovery, that means more active P700 can participate in CEF (Fig. 3) without considering  
401 over-acidification in lumen. Therefore, CEF induction mechanism in treatment NaCl + Put  
402 basically benefits from buffering character of Put.

#### 403 *Enhanced CEF promotes ATP production*

404 In return, increased level of CEF supplied more ATP for CO<sub>2</sub> assimilation in NaCl + Put (Fig.  
405 7A). Inhibition of CO<sub>2</sub> assimilation by stresses leads to over-reduction of electron transport

406 chain indirectly, increasing reduction level of intersystem electron transporter promotes CEF  
407 around PSI (Suorsa et al., 2015). Indeed, salt stressed leaves had a higher redox state of PQ  
408 pool (represented by 1-qP, Fig. 2D) and was over-reduced in PSI acceptor side (Fig. 7C),  
409 which was able to be an important factor to induce a higher CEF in NaCl stressed leaves (Fig.  
410 4, 5). Additionally, ATP content is also a regulatory factor for interconversion between LEF  
411 and CEF. Salt stressed leaves with a lower light-induced ATP content (Fig. 7A) needs an  
412 alternative pathway such as CEF around PSI to supplement the deficiency, which used to  
413 maintain themselves alive and continue to growth. Whereas, exogenous Put played a critical  
414 role like a fuel, driven a stronger and completely different salt tolerance mechanism in  
415 thylakoid.

416 Sufficient ATP together with surplus NADPH contributes to CO<sub>2</sub> assimilation progress, the  
417 activity of RCA detected in NaCl + Put treatment was higher than that in NaCl treated leaves  
418 (Fig. 7D), which directly helpful to a rebalance of NADP<sup>+</sup>/NADPH ratio (Fig. 7C). Increased  
419 number of NADP<sup>+</sup> relieves pressure at PSI acceptor side, and a higher level of CEF makes  
420 excess electrons revolved around PSI also alleviate stress at PSI acceptor side.

421 *Energy dissipation is switched from non-photochemical quenching to photochemical*  
422 *quenching after Put treatment for salt stressed plants*

423 If the flow of electrons through the electron transport chain exceeds the capacity of  
424 metabolism to consume the reductant production, then potentially harmful side reactions are  
425 liable to occur (Hald et al., 2008). The best characterised regulatory mechanism for limiting  
426 damage is non photochemical quenching (NPQ) (Li et al., 2000; 2002; Pascal et al., 2005).  
427 According to relaxation kinetics in darkness following a period of illumination, the  
428 energy-dependent non-photochemical quenching (qE) is the major and most rapid component  
429 of NPQ in plants (Fig. 2F; (Horton and Hague, 1988). Generation of qE requires the build-up  
430 of trans-membrane  $\Delta$ pH, which in the chloroplast is mainly induced by electron transport  
431 chain (including LEF and CEF) (Aihara et al., 2016; Sun et al., 2017).  $\Delta$ pH together with  $\Delta\psi$   
432 composes *pmf* in thylakoid lumen, and they can be converted to each other (Avenson et al.,  
433 2004; 2005). When plants are under optimal condition, the down-regulation of photochemical  
434 quenching is not needed, so a large fraction of *pmf* can be stored as  $\Delta\psi$ , leading to moderate  
435 lumen pH and low qE, even at high *pmf* (and thus high rates of ATP synthesis). When plants



436 suffer from environmental stresses e.g., salt stress, high temperature, high light, chilling et al.,  
437 the photoprotection is obligatory, *pmf* can be predominantly stored as  $\Delta pH$ , maximizing  
438 lumen acidification for a given *pmf* (Ioannidis et al., 2012). In the present study, we found that  
439 stressed leaves showed lower  $\Delta\psi$  and higher  $\Delta pH$  compared with the control plants (Fig. 6 A  
440 and C), which allowed the membrane to induce strong qE and down-regulate photochemical  
441 quenching, resulting in the production of ATP slowed down. Nevertheless, over-acidification  
442 in lumen will inhibit the oxidation of plastoquinol by deactivating the Cyt *b<sub>6</sub>f* (Harbinson and  
443 Hedley, 1993; Laisk et al., 2005). Exogenous Put neutralized excess  $H^+$  in lumen and built a  
444 moderate pH condition, leading to maintain high level of CEF in salt stressed leaves, no need  
445 to worry about inactivation of electron transporters. Furthermore, the qE was reduced, and  
446 most of the excited energy were transferred to photochemical quenching. The efficient  
447 photochemical electron transport chain (PETC) in NaCl + Put treated plants is necessary for  
448 normal growth (Fig. 1 and S1); High level of CEF is driven to produce extra ATP for PSI  
449 repair and  $CO_2$  fixation, and it plays a buffer role in PSI acceptor side (Fig. 9).

450 In conclusion, 90 mM NaCl caused photoinhibition of both photosystems, CEF is induced  
451 to protect them not be damaged. Exogenous Put reduces  $\Delta pH$  across thylakoid membrane to  
452 avoid over-acidification in lumen, accompanied by decreasing non-photochemical quenching.  
453 In addition, ATP synthesis is accelerated by Put. The lower  $\Delta pH$  and higher content of ATP are  
454 crucial for strengthening CEF to enhance photoprotection of thylakoid apparatus, further  
455 increasing the utilization efficiency of light energy (Fig. 9).

#### 456 **Supplementary data**

457 Supplementary data are available at *JXB* online.

458 Table. S1. Primer sequences used in quantitative real-time PCR assays

459 Figure. S1. Changes of growth parameters in cucumber seedlings under NaCl and/or Put  
460 treatment for 7 days.

461 Figure. S2. Dark-relaxation of Y(II) of cucumber leaves under NaCl and/or Put treatment  
462 for 7 days.

463 Figure. S3. Sequence alignment of ferredoxin related proteins in *cucumis sativus* L. and *A.*  
464 *thaliana*.

465 Figure. S4. The redox state of P700 in cucumber seedlings when the leaves there treated



466 with 2 mM MV (methyl viologen, an electron acceptor of P700, also an inhibitor of CEF).

467 **Acknowledgements**

468 Thanks to my supervisor, Guo Shirong, for his significant support for my work. And I am  
469 grateful to the numerous individuals who participated in this research. Mr. Sheng Shu and Mr.  
470 Yu Wang provided critical discussion and comments, I also thank Ruonan Yuan for help with  
471 experiment technology. This work was supported by the National Natural Science Foundation  
472 of China (No. 31672199 and No. 31471869) and was supported by China Agriculture  
473 Research System (CARS-23-B12).

## References

- Aihara Y, Takahashi S, Minagawa J.** 2016. Heat induction of cyclic electron flow around photosystem I in the symbiotic dinoflagellate *Symbiodinium*. *Plant Physiology* **171**, 522-529.
- Avenson TJ, Cruz JA, Kanazawa A, Kramer DM.** 2005. Regulating the proton budget of higher plant photosynthesis. *Proceeding of the National Academy Sciences, USA* **102**, 9709-9713.
- Avenson TJ, Cruz JA, Kramer DM.** 2004. Modulation of energy-dependent quenching of excitons in antennae of higher plants. *Proceeding of the National Academy Sciences, USA* **101**, 5530-5535.
- Blanco NE, Ceccoli RD, Segretin ME, et al.** 2011. Cyanobacterial flavodoxin complements ferredoxin deficiency in knocked-down transgenic tobacco plants. *The Plant Journal* **65**, 922-935.
- Burrows PA, Sazanov LA, Svab Z, Maliga P, Nixon PJ.** 1998. Identification of a functional respiratory complex in chloroplasts through analysis of tobacco mutants containing disrupted plastid *ndh* genes. *Embo Journal* **17**, 868-876.
- Capell T, Bassie L, Christou P.** 2004. Modulation of the polyamine biosynthetic pathway in transgenic rice confers tolerance to drought stress. *Proceedings of the National Academy Sciences, USA* **101**, 9909-9914.
- Chen P, Yan K, Shao H, Zhao S.** 2013. Physiological mechanisms for high salt tolerance in wild soybean (*Glycine soja*) from yellow river delta, China: photosynthesis, osmotic regulation, ion flux and antioxidant capacity. *PIOS ONE* **8**, e83227.
- Dalcorso G, Pesaresi P, Masiero S, Aseeva E, Schünemann D, Finazzi G, Joliot P, Barbato R, Leister D.** 2008. A complex containing PGRL1 and PGR5 is involved in the switch between linear and cyclic electron flow in *Arabidopsis*. *Cell* **132**, 273-285.
- Demetriou G, Neonaki C, Navakoudis E, Kotzabasis K.** 2007. Salt stress impact on the molecular structure and function of the photosynthetic apparatus-The protective role of polyamines. *Biochimica et Biophysica Acta* **1767**, 272-280.
- Evans EH, Crofts AR.** 1973. The relationship between delayed fluorescence and the H<sup>+</sup> gradient in chloroplasts. *Biochimica et Biophysica Acta* **292**, 130-139.
- Galston AW, Sawhney RK.** 1990. Polyamines in plant physiology. *Plant Physiology* **94**, 406-410.
- Hald S, Nandha B, Gallois P, Johnson GN.** 2008. Feedback regulation of photosynthetic electron transport by NADP(H) redox poise. *Biochimica et Biophysica Acta* **1777**, 433-440.
- Hamdani S, Yaakoubi H, Carpentier R.** 2011. Polyamines interaction with thylakoid proteins during stress. *Journal of Photochemistry and Photobiology B: Biology* **104**, 314-319.
- Harbinson J, Hedley CL.** 1993. Changes in P-700 oxidation during the early stages of the induction of photosynthesis. *Plant Physiology* **103**, 649-660.
- He Y, Fu JL, Yu CL, et al.** 2015. Increasing cyclic electron flow is related to Na<sup>+</sup> sequestration into vacuoles for salt tolerance in soybean. *Journal of Experimental Botany* **66**, 6877-6889.
- Holtgreve S, Bader KP, Horton P, Scheibe R, Von Schaewen A, Backhausen JE.** 2003. Decreased content of leaf ferredoxin changes electron distribution and limits photosynthesis

in transgenic potato plants. *Plant Physiology* **133**, 1768-1778.

**Horton P, Hague A.** 1988. Studies on the induction of chlorophyll fluorescence in isolated barley protoplasts. IV. Resolution of non-photochemical quenching. *Biochemica et Biophysica Acta* **932**, 107-115.

**Horváth EM, Peter SO, Joët T, et al.** 2000. Targeted inactivation of the plastid *ndhB* gene in tobacco results in an enhanced sensitivity of photosynthesis to moderate stomatal closure. *Plant Physiology* **123**, 1337-1350.

**Hussain SS, Ali M, Ahmad M, Siddique KHM.** 2011. Polyamines: Natural and engineered abiotic and biotic stress tolerance in plants. *Biotechnology Advances* **29**, 300-311.

**Ioannidis NE, Cruz JA, Kotzabasis K, Kramer DM.** 2012. Evidence that putrescine modulates the higher plant photosynthetic proton circuit. *PLoS ONE* **7**, e29864.

**Ioannidis NE, Kotzabasis K.** 2007. Effects of polyamines on the functionality of photosynthetic membrane in vivo and in vitro. *Biochemica et Biophysica Acta* **1767**, 1372-1382.

**Ioannidis NE, Kotzabasis K.** 2014. Polyamines in chemiosmosis *in vivo*: A cunning mechanism for the regulation of ATP synthesis during growth and stress. *Front Plant Sci* **5**, 71.

**Ioannidis NE, Sfichi L, Kotzabasis K.** 2006. Putrescine stimulates chemiosmotic ATP synthesis. *Biochemica et Biophysica Acta* **1757**, 821-828.

**Kalaji HM, Govindjee, Bosa K, Koscielniak J, Żuk-Golaszewska K.** 2011. Effects of salt stress on photosystem II efficiency and CO<sub>2</sub> assimilation of two Syrian barley landraces. *Environmental and Experimental Botany* **73**, 64-72.

**Kaur-Sawhney R, Altman A, Galston AW.** 1978. Dual mechanisms in polyamine-mediated control of ribonuclease activity in oat leaf protoplast. *Plant Physiology* **62**, 158-160.

**Lütz C, Navakoudis E, Seidlitz H, Kotzabasis K.** 2005. Simulated solar irradiation with enhanced UV-B adjust plastid- and thylakoid-associated polyamine changes for UV-B protection. *Biochemica et Biophysica Acta* **1710**, 24-33.

**Laisk A, Eichelmann H, Oja V, Peterson RB.** 2005. Control of cytochrome *b(6)f* at low and high light intensity and cyclic electron transport in leaves. *Biochemica et Biophysica Acta* **1708**, 79-90.

**Li XP, Björkman O, Shih C, Grossman AR, Rosenquist M, Jansson S, Niyogi KK.** 2000. A pigment-binding protein essential for regulation of photosynthetic light harvesting. *Nature* **403**, 391-395.

**Li XP, Müller-Moulé P, Gilmore AM, Niyogi KK.** 2002. PsbS-dependent enhancement of feedback de-excitation protects photosystem II from photoinhibition. *Proceeding of the National Academy Sciences, USA* **99**, 15222-15227.

**Liu J, Wang P, Liu B, Feng DR, Zhang J, Su JB, Zhang Y, Wang JF, Wang HB.** 2013. A deficiency in chloroplastic ferredoxin 2 facilitates effective photosynthetic capacity during long-term high light acclimation in *Arabidopsis thaliana*. *The Plant Journal* **76**, 861-874.

**Lu CM, Qiu NW, Wang BS, Zhang JH.** 2003. Salinity treatment shows no effects on photosystem II photochemistry, but increases the resistance of photosystem II to heat stress in halophyte *Suaeda salsa*. *Journal of Experimental Botany* **54**, 851-860.

**Medina M, Gómez-Moreno C.** 2004. Interaction of ferredoxin-NADP<sup>+</sup> reductase with its substrates: optimal interaction for efficient electron transfer. *Photosynthesis Research* **79**,

113-131.

**Mehta P, Allakhverdiev SI, Jajoo A.** 2010. Characterization of photosystem II heterogeneity in response to high salt stress in wheat leaves (*Triticum aestivum*). *Photosynthesis Research* **105**, 249-255.

**Mehta P, Kraslavsky V, Bharti S, Allakhverdiev SI, Jajoo A.** 2011. Analysis of salt stress induced changes in photosystem II heterogeneity by prompt fluorescence and delayed fluorescence in wheat (*Triticum aestivum*) leaves. *Journal of Photochemistry and Photobiology B-Biology* **104**, 308-313.

**Muller P, Li X, Niyogi K.** 2001. Non-photochemical quenching. A response to excess light energy. *Plant Physiology* **125**, 1558-1566.

**Munekage Y, Hashimoto M, Miyake C, Tomizawa K-I, Endo T, Tasaka M, Shikanai T.** 2004. Cyclic electron flow around photosystem I is essential for photosynthesis. *Nature* **429**, 579-582.

**Munekage Y, Hojo M, Meurer J, Endo T, Tasaka M, Shikanai T.** 2002. *PGR5* Is Involved in Cyclic Electron Flow around Photosystem I and Is Essential for Photoprotection in *Arabidopsis*. *Cell* **110**, 361-371.

**Munns R, Tester M.** 2008. Mechanisms of salinity tolerance. *Annual Review of Plant Biology* **59**, 651-681.

**Niyogi KK.** 1999. PHOTOPROTECTION REVISITED: Genetic and molecular approaches. *Annual Review of Plant Biology* **50**, 333-359.

**Pascal AA, Liu ZF, Broess K, et al.** 2005. Molecular basis of photoprotection and control of photosynthetic light-harvesting. *Nature* **436**, 134-137.

**Pospíšil P, Dau H.** 2002. Valinomycin sensitivity proves that light-induced thylakoid voltages result in millisecond phase of chlorophyll fluorescence transients. *Biochimica et Biophysica Acta* **1554**, 94-100.

**Schuber F.** 1989. Influence of polyamines on membrane function. *Biochemical Journal* **260**, 1-10.

**Shikanai T.** 2007. Cyclic electron transport around photosystem I: genetic approaches. *Annual Review of Plant Biology* **58**, 199-217.

**Shikanai T, Endo T, Hashimoto T, Yamada Y, Asada K, Yokota A.** 1998. Directed disruption of the tobacco *ndhB* gene impairs cyclic electron flow around photosystem I. *Proceedings of the National Academy of Sciences, USA* **95**, 9705-9709.

**Shu S, Guo SR, Sun J, Yuan LY.** 2012. Effects of salt stress on the structure and function of the photosynthetic apparatus in *Cucumis sativus* and its protection by exogenous putrescine. *Photochemistry and Photobiology* **146**, 285-296.

**Shu S, Yuan LY, Guo SR, Sun J, Yuan YH.** 2013. Effects of exogenous spermine on chlorophyll fluorescence, antioxidant system and ultrastructure of chloroplasts in *Cucumis sativus* L. under salt stress. *Plant Physiology and Biochemistry* **63**, 209-216.

**Strasser B, Sánchez-Lamas M, Yanovsky MJ, Casal JJ, Cerdán PD.** 2010. *Arabidopsis thaliana* life without phytochromes. *Proceeding of the National Academy Sciences, USA* **107**, 4776-4781.

**Sun YJ, Geng QW, Du YP, Yang XH, Zhai H.** 2017. Induction of cyclic electron flow around photosystem I during heat stress in grape leaves. *Plant Science* **256**, 65-71.

**Suorsa M, Rossi F, Tadini L, et al.** 2015. *PGR5-PGRL1*-dependent cyclic electron transport

- modulates linear electron transport rate in *Arabidopsis thaliana*. *Molecular Plant* **9**, 271-288.
- Takabayashi A, Ishikawa N, Obayashi T, Ishida S, Obokata J, Endo T, Sato F.** 2009. Three novel subunits of Arabidopsis chloroplastic NAD(P)H dehydrogenase identified by bioinformatic and reverse genetic approaches. *The Plant Journal* **57**, 207-219.
- Wang P, Duan W, Takabayashi A, Endo T, Shikanai T, Ye J, Mi H.** 2006. Chloroplastic NAD(P)H dehydrogenase in tobacco leaves functions in alleviation of oxidative damage caused by temperature stress. *Plant Physiology* **141**, 465-474.
- Yan K, Wu CW, Zhang LH, Chen XB.** 2015. Contrasting photosynthesis and photoinhibition in tetraploid and its autodiploid honeysuckle (*Lonicera japonica* Thunb.) under salt stress. *Frontiers in Plant Science* **6**, 227.
- Yuan RN, Shu S, Guo SR, Sun J, Wu JQ.** 2017. The positive roles of exogenous putrescine on chlorophyll metabolism and xanthophyll cycle in salt-stressed cucumber seedlings. *Photosynthetic* 1-10.
- Yuan YH, Shu S, Li SH, He LZ, Li H, Du NS, Sun J, Guo SR.** 2014. Effects of exogenous putrescine on chlorophyll fluorescence imaging and heat dissipation capacity in cucumber (*Cucumis sativus* L.) under salt stress. *Journal of Plant Growth Regulation* **33**, 798-808.
- Zhang HM, Whitelegge JP, Cramer WA.** 2001. Ferredoxin: NADP<sup>+</sup> oxidoreductase is a subunit of the chloroplast cytochrome *b<sub>6</sub>* complex. *Journal of Biological Chemistry* **276**, 38159-38165.
- Zhang Y, Ding SH, Lu QT, Yang ZP, Wen XG, Zhang LX, Lu CM.** 2011. Characterization of photosystem II in transgenic tobacco plants with decreased iron superoxide dismutase. *Biochimica et Biophysica Acta* **1807**, 391-403.
- Zhang Z, Jia Y, Gao H, Zhang L, Li H, Meng Q.** 2011. Characterization of PSI recovery after chilling-induced photoinhibition in cucumber (*Cucumis sativus* L.) leaves. *Planta* **234**, 883-889.





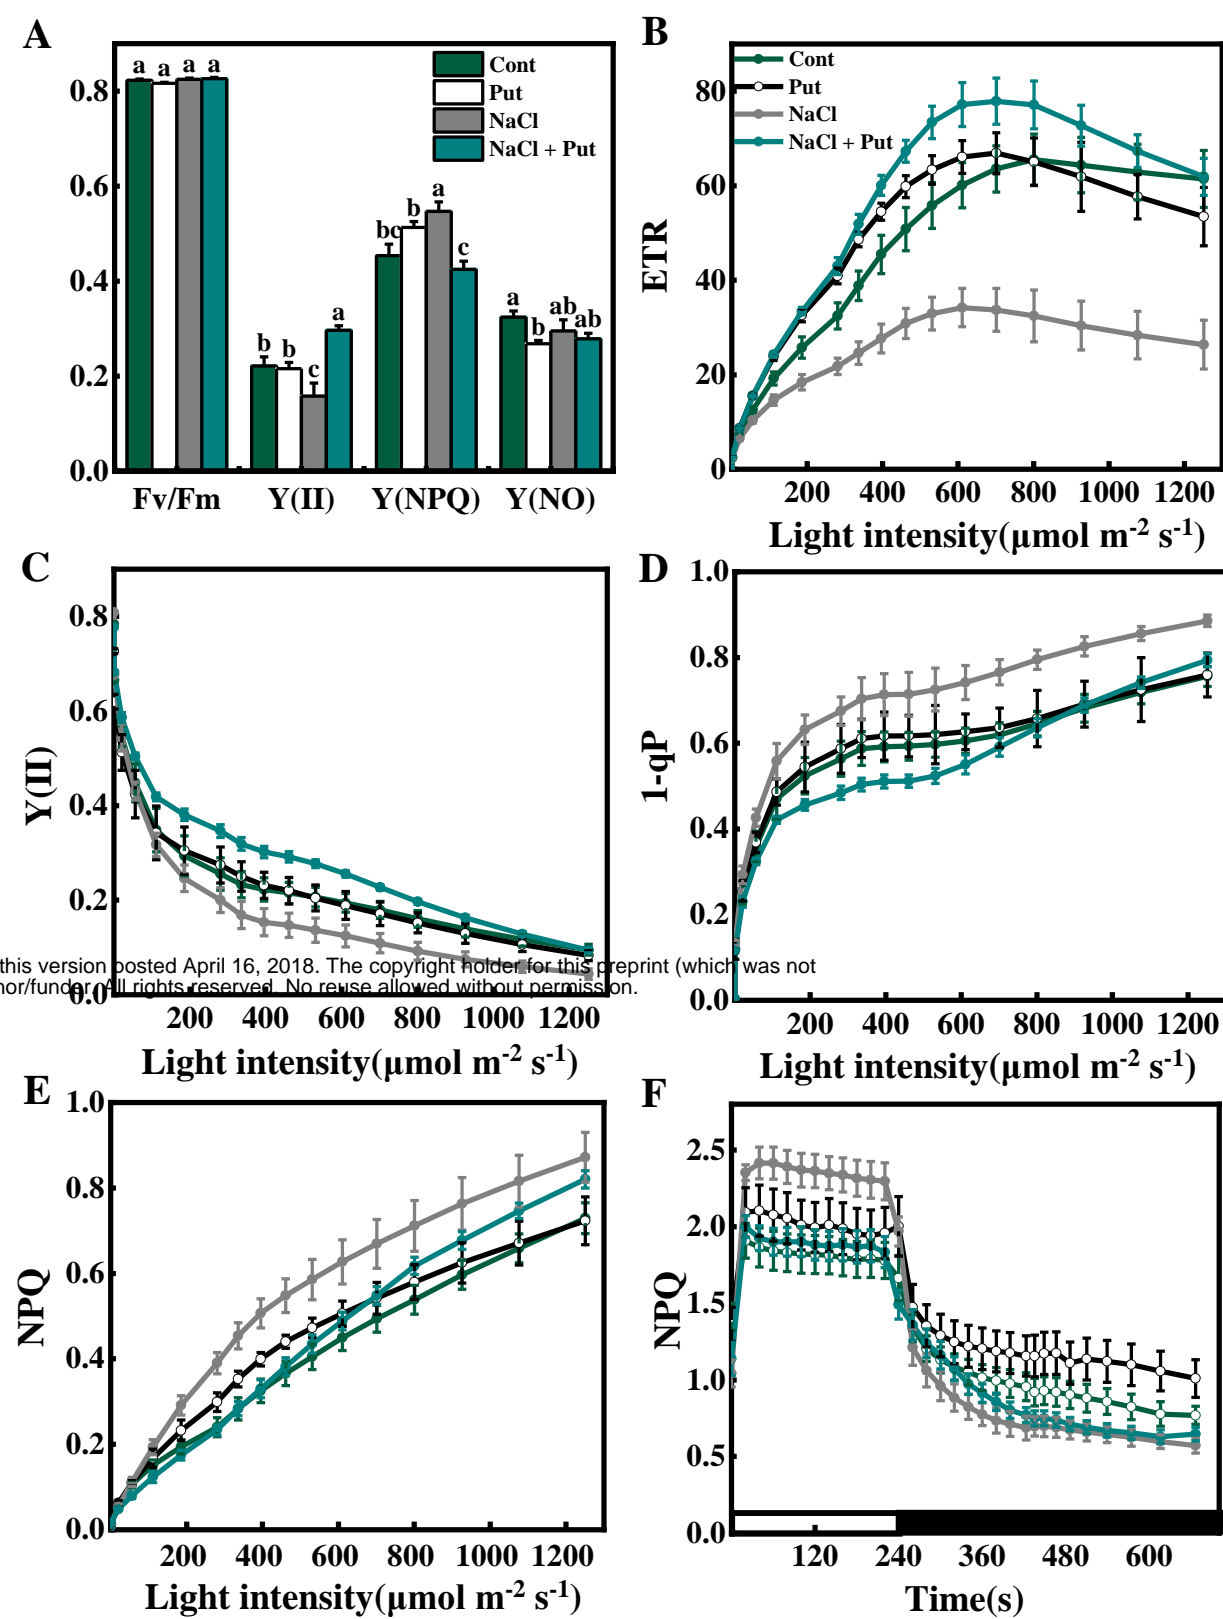

Fig. 2. Effects of salt stress and exogenous Put on photosynthetic properties of PSII in cucumber seedlings. The third, fully dark-adapted leaves (top to down) of cucumber seedlings after NaCl and/or Put treatment for 7 days were used in this experiment. (A) *Fv/Fm*, *Y(II)*, *Y(NPQ)*, *Y(NO)*. (B-E) Photoresponse curve of *ETR*, *Y(II)*, *1-qP* and *NPQ* respectively. (F) Dark-light transition (240 s) and relaxation (506 s) of *NPQ*. The means  $\pm$  SD measured at least three independent experiments.

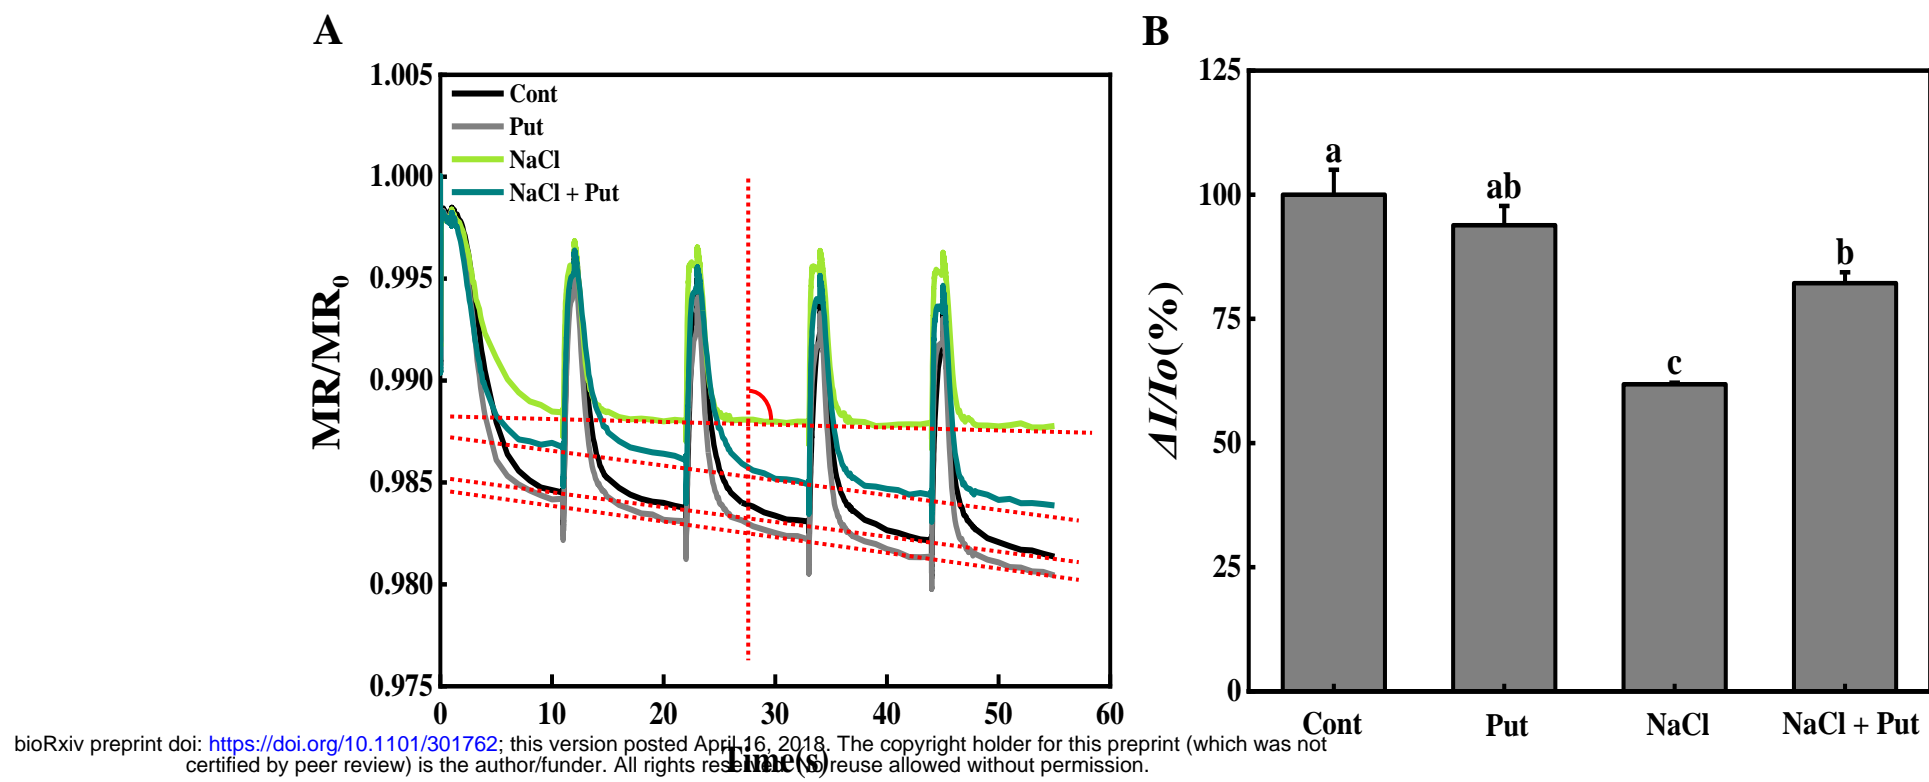

Fig. 3. Effects of salt stress and exogenous Put on P700 in cucumber seedlings. (A) 5 repeat measurement of P700 redox state by 1s red light followed with 10 s far-red light illumination. (B) The content of active P700 ( $\Delta I/I_0$ ). The leaves used for measurement were the same as those used for the Chl fluorescence in Fig. 2.



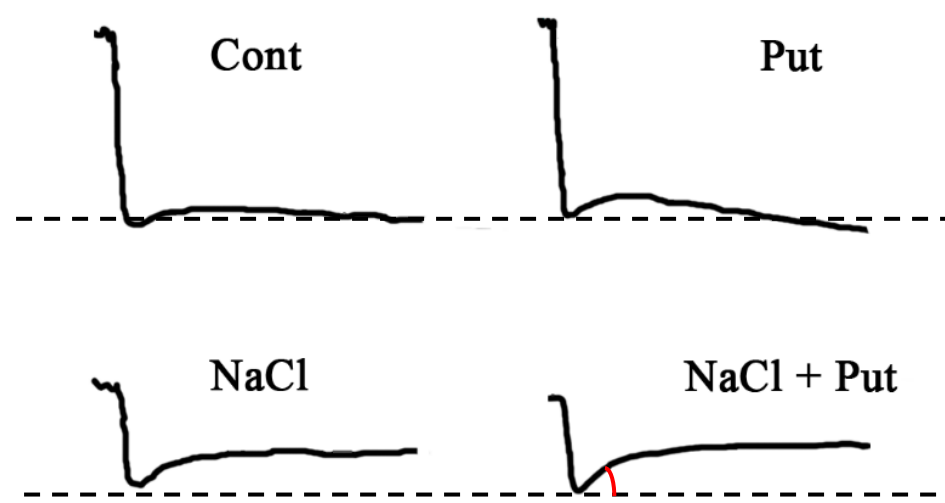

bioRxiv preprint doi: <https://doi.org/10.1101/301762>; this version posted April 16, 2018. The copyright holder for this preprint (which was not certified by peer review) is the author/funder. All rights reserved. No reuse allowed without permission.

Fig. 4. Effects of salt stress and exogenous Put on post-illumination. The typical post-illumination transient increase induction curve was measured by the third (top to down), fully dark-adapted leaves. When the fluorescence got steady, turned off the actinic light and record fluorescence increase signal.

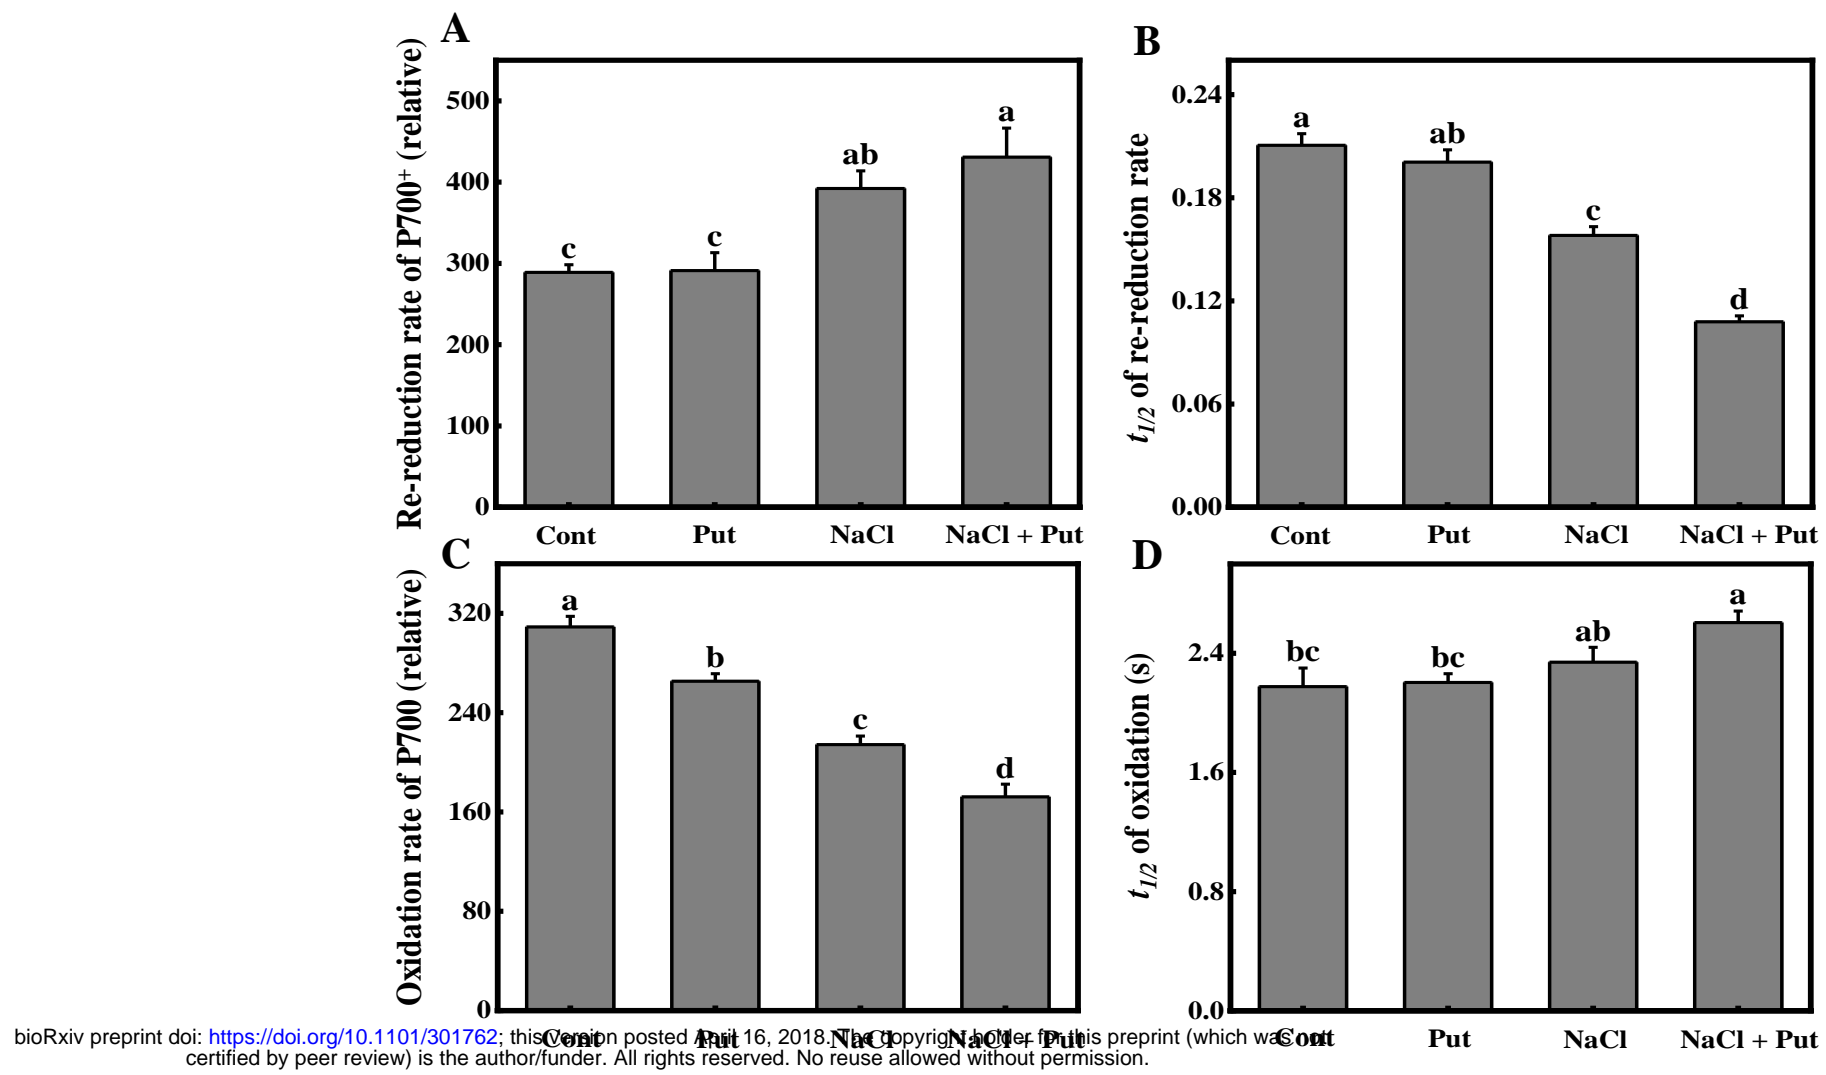

Fig. 5. The redox rate and  $t_{1/2}$  of P700 in different treated cucumber leaves. Bars represent the mean  $\pm$  SD of at least three independent experiments. Different letters indicate significantly different values ( $P < 0.05$ ) by Tukey's test.

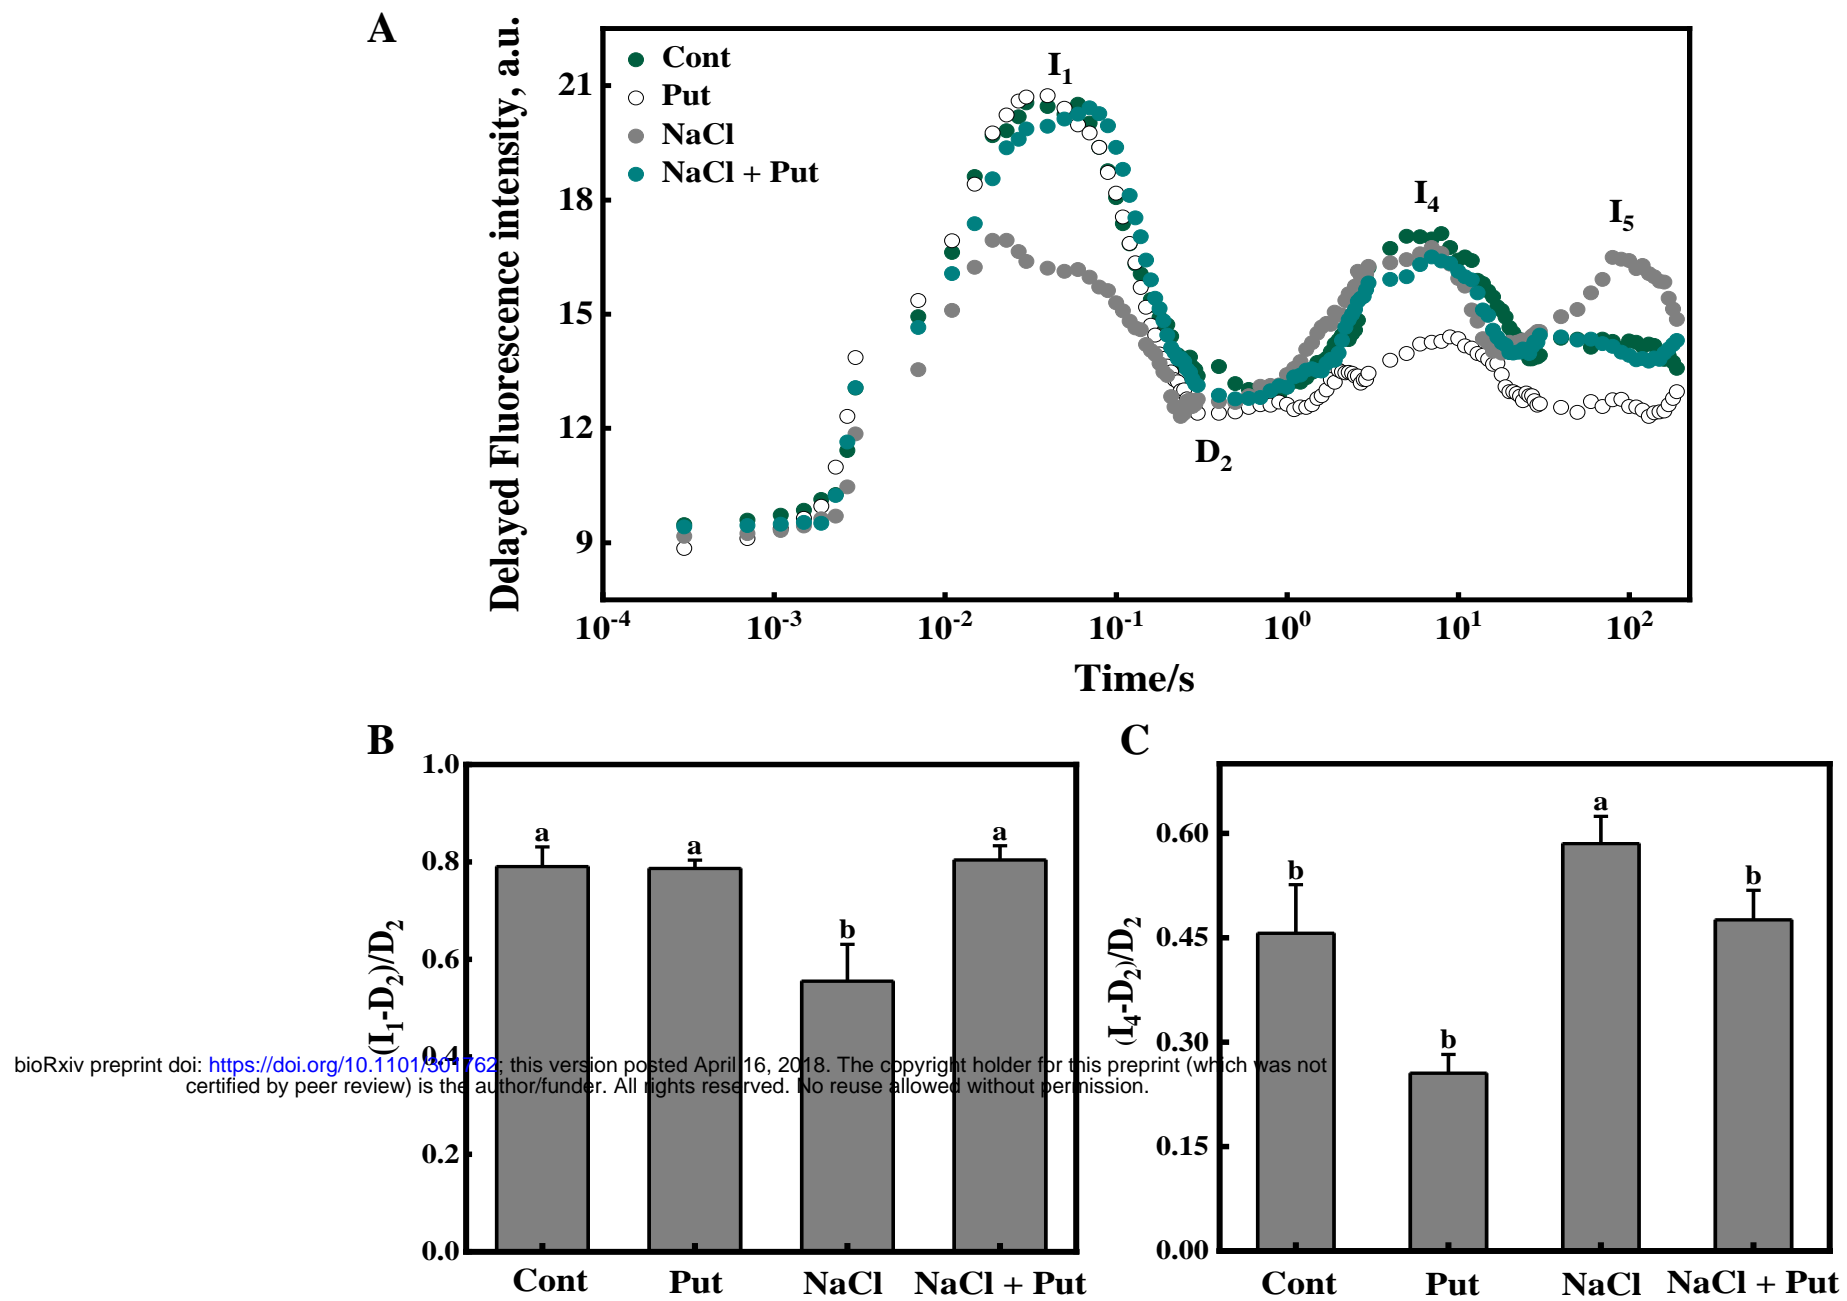

Fig. 6. Effects of salt stress and exogenous Put on delayed fluorescence. (A) Delayed fluorescence induction curves (on log time scale), maxima in the figures are designated as  $I_1$ ,  $I_4$ ,  $I_5$ , while the minimum is designated by  $D_2$ . Other maxima are not pronounced in our samples. (B, C) Delayed fluorescence parameters. Bars represent the mean  $\pm$  SD of at least three independent experiments. Different letters indicate significantly different values ( $P < 0.05$ ) by Tukey's test.

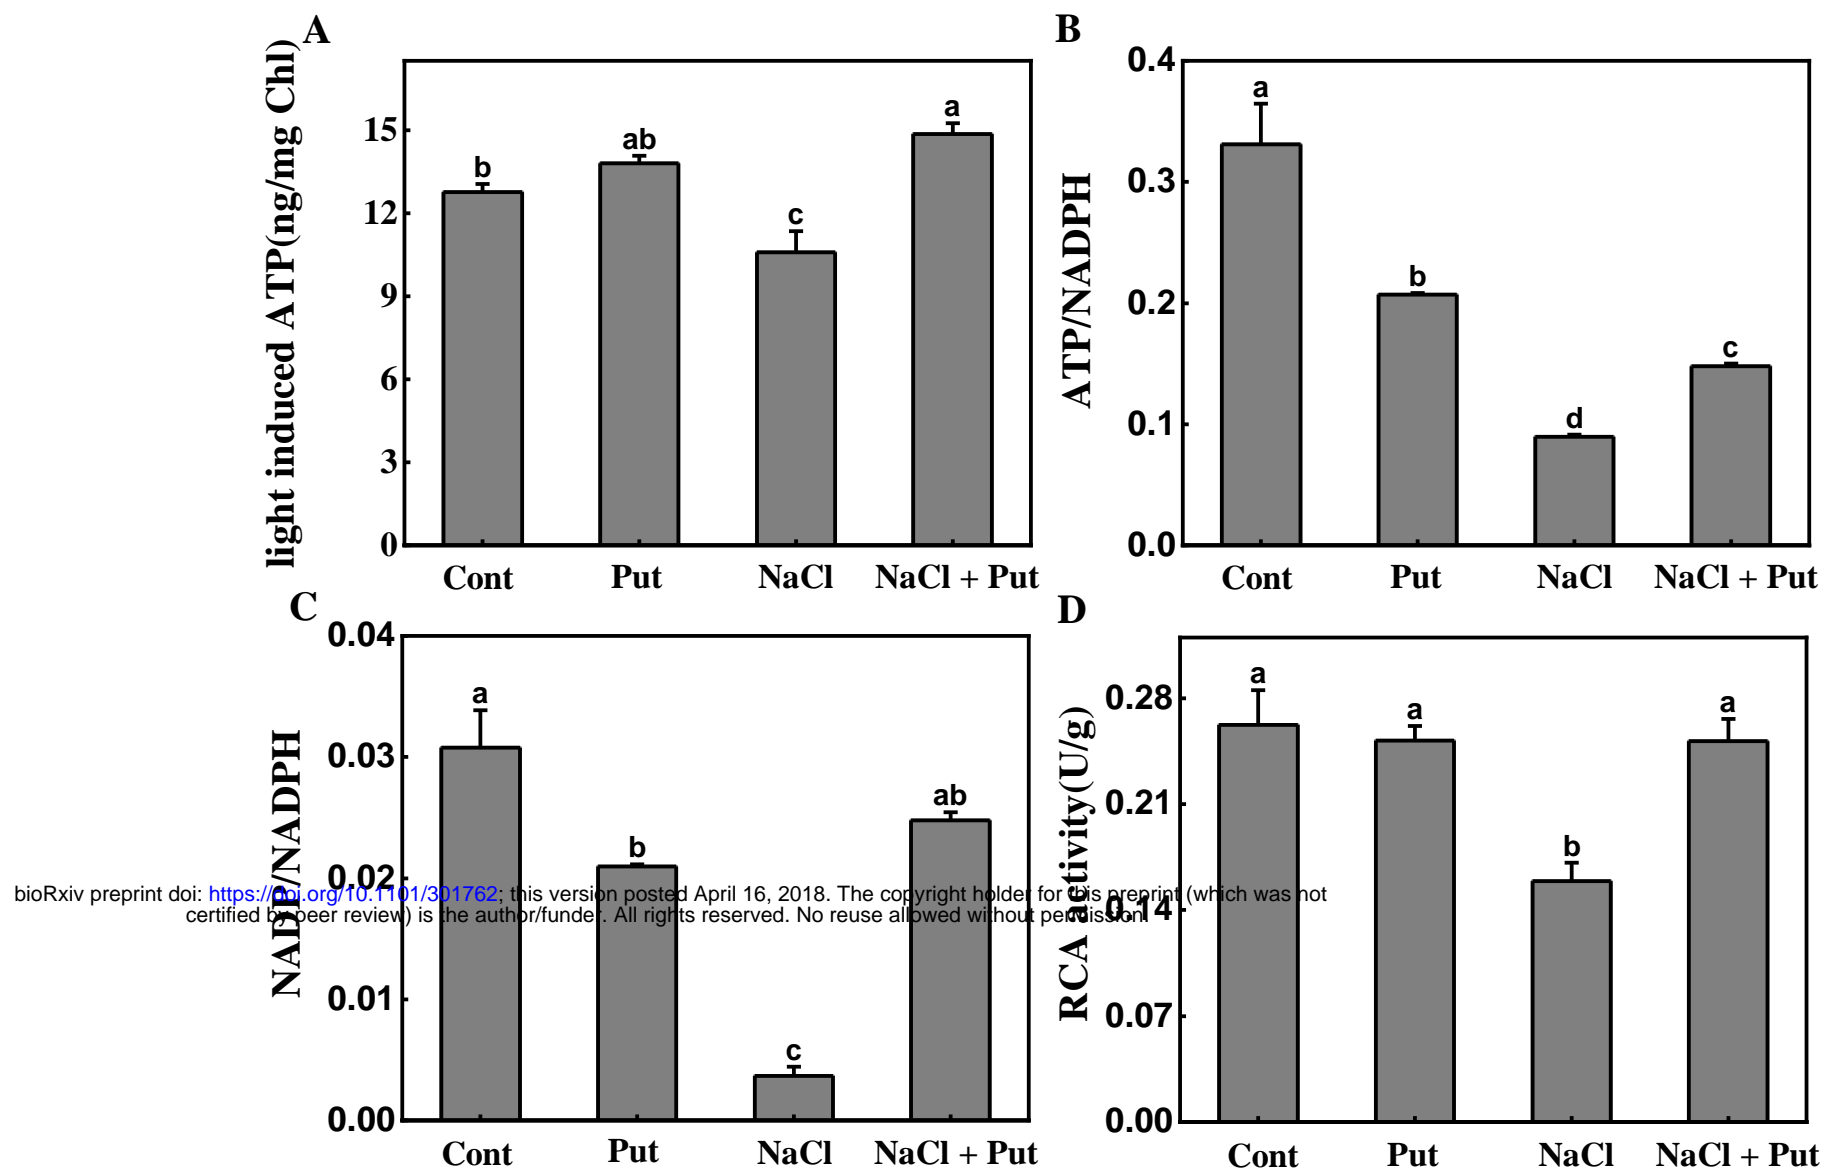

Fig. 7 Light induced ATP, ATP/NADPH, NADP/NADPH and RCA activity in different treated plants. The dark-adapted and light-induced leaves were used for these measurements. (A) Production of Light induced ATP; (B) ATP/NADPH; (C) NADP/NADPH; (D) Activity of RCA. Different letters indicate significantly different values ( $P < 0.05$ ) by Tukey's test.

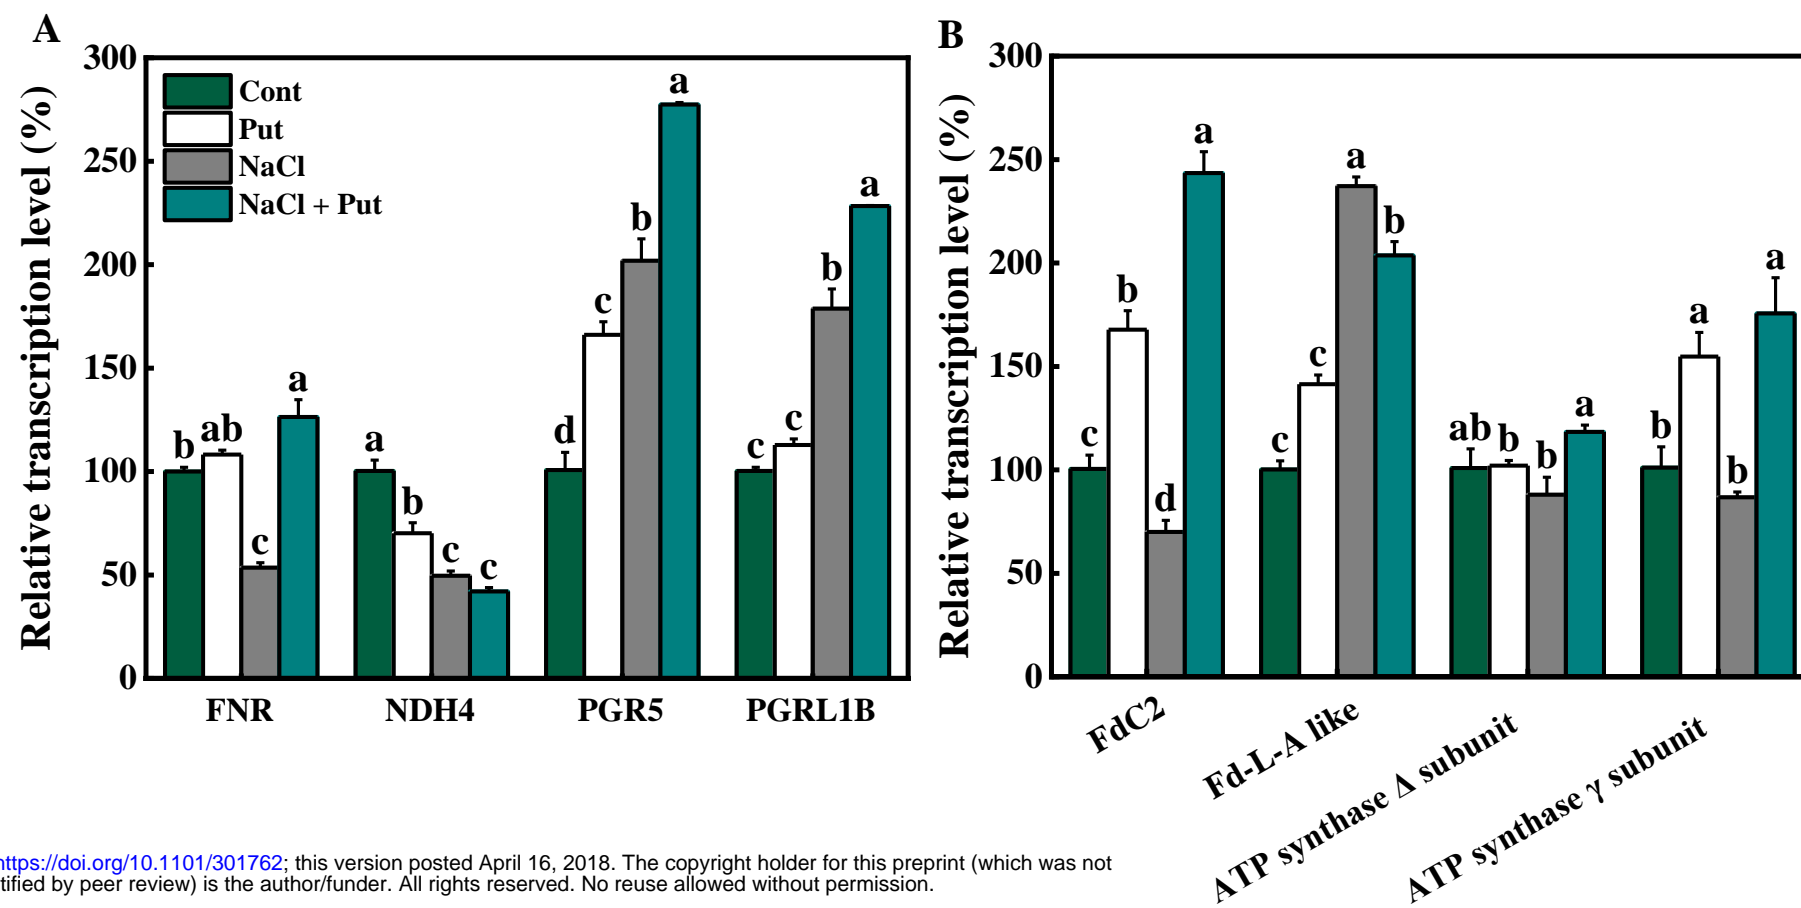

bioRxiv preprint doi: <https://doi.org/10.1101/301762>; this version posted April 16, 2018. The copyright holder for this preprint (which was not certified by peer review) is the author/funder. All rights reserved. No reuse allowed without permission.

Fig. 8. Genes expression analysis of electron transport related proteins in different treated plants. Transcript levels of these genes were measured after NaCl and/or Put treatment for 7 days. Different letters indicate significantly different values ( $P < 0.05$ ) by Tukey's test.

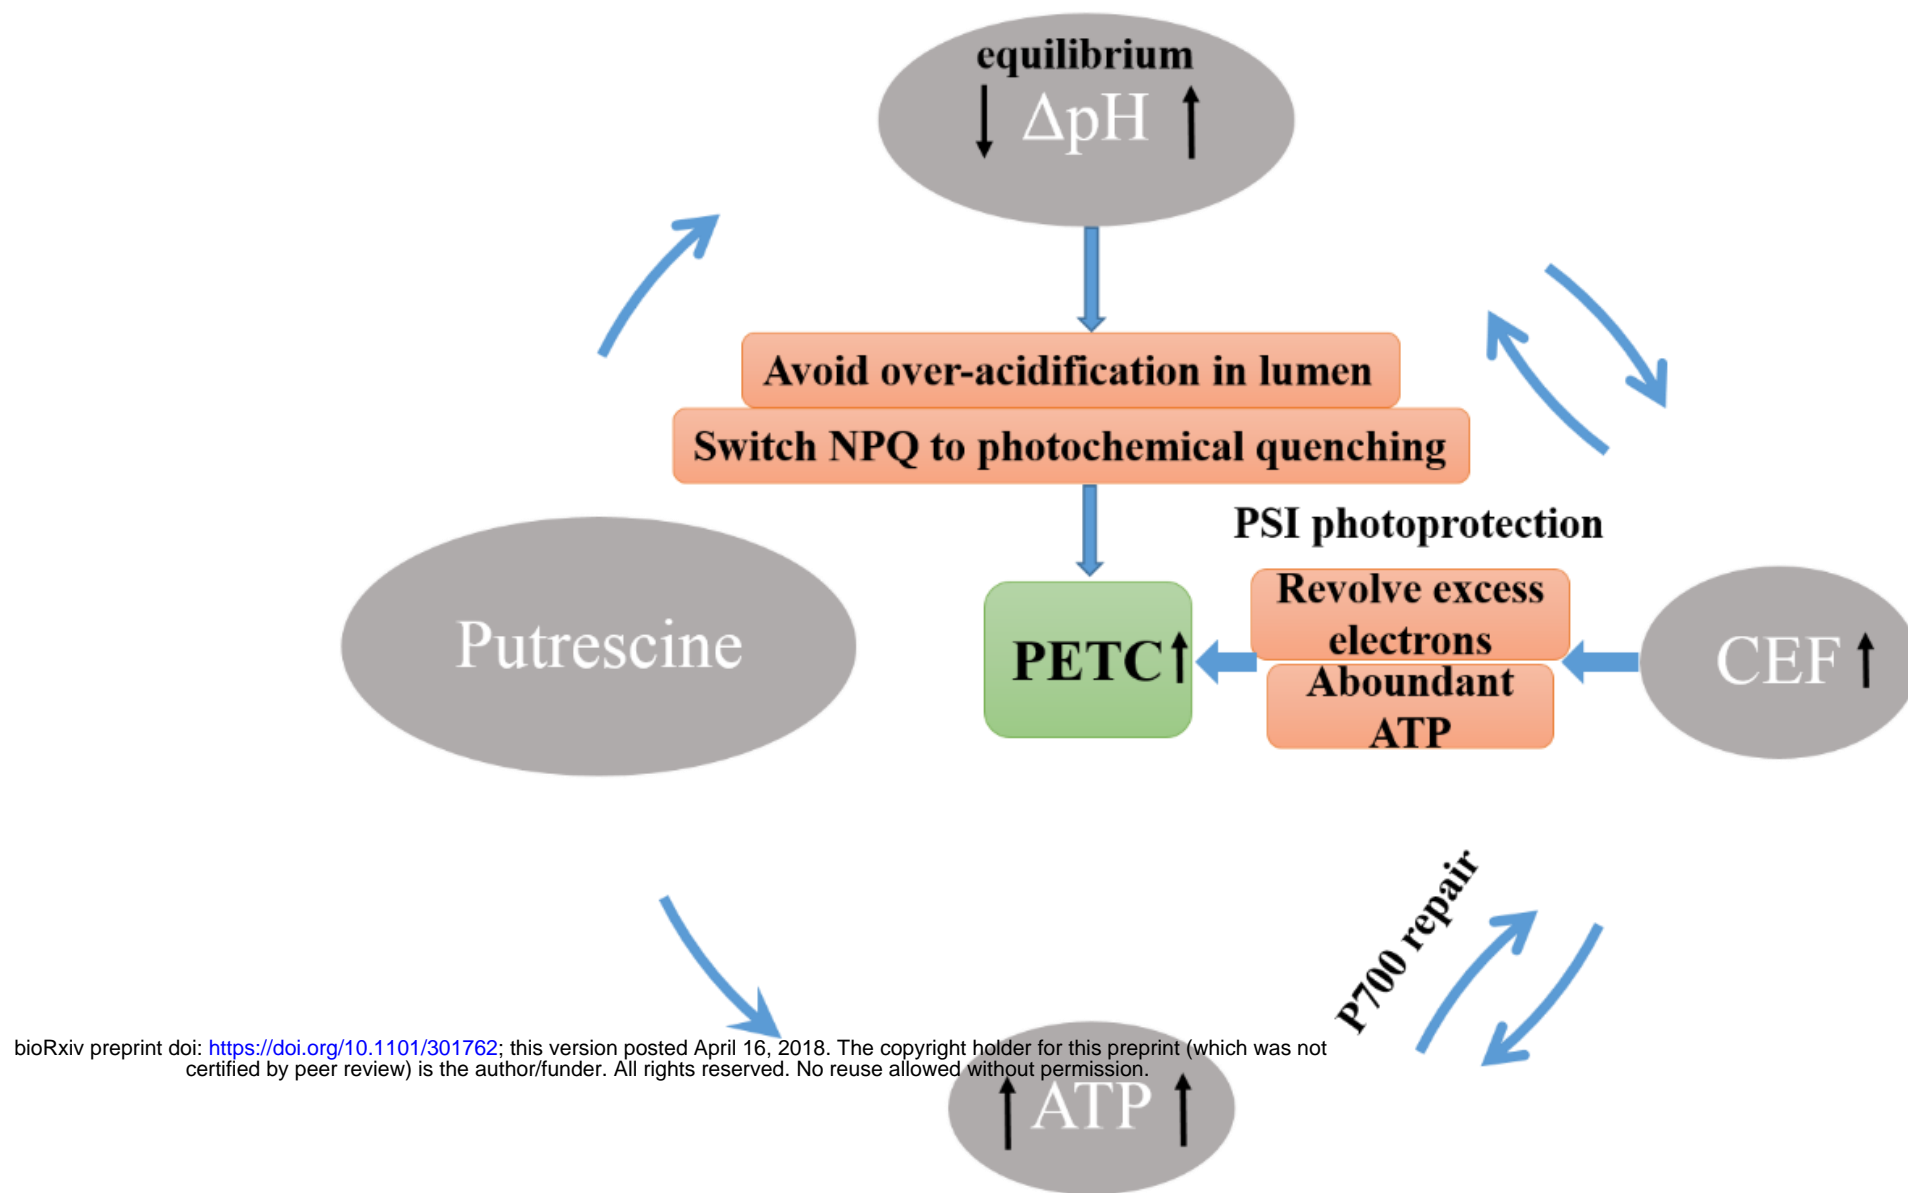

Fig. 9. Model for putrescine inducing photoprotection in cucumber leaves under salt stress. Exogenous putrescine reduces  $\Delta pH$  across thylakoid membrane to avoid over-acidification in lumen, accordingly decreased non-photochemical quenching. In addition, ATP synthesis is accelerated by Put. The lower  $\Delta pH$  and higher content of ATP are crucial for strengthening CEF to enhance photoprotection.
